# Supplementary material for: Stress of working abroad: a systematic review
Source: PubMed Central journal article supplement (PMC6132646; doi:10.1007/s00420-018-1333-4), 2018-07-02
Supplement: 420_2018_1333_MOESM1_ESM.pdf [file 420_2018_1333_MOESM1_ESM.pdf]

## Supplementary

### Supplementary A

#### Searching strategy

Search terms

PubMed:

((("work"[MeSH Terms] OR "work"[All Fields]) OR International[All Fields] OR Abroad[All Fields] OR ("emigrants and immigrants"[MeSH Terms] OR ("emigrants"[All Fields] AND "immigrants"[All Fields]) OR "emigrants and immigrants"[All Fields] OR "immigrant"[All Fields])) AND (("ethnology"[Subheading] OR "ethnology"[All Fields] OR "culture"[All Fields] OR "culture"[MeSH Terms]) OR ("social adjustment"[MeSH Terms] OR ("social"[All Fields] AND "adjustment"[All Fields]) OR "social adjustment"[All Fields] OR "adjustment"[All Fields] OR "adaptation, psychological"[MeSH Terms] OR ("adaptation"[All Fields] AND "psychological"[All Fields]) OR "psychological adaptation"[All Fields])) AND (("Stress"[Journal] OR "stress"[All Fields]) OR (mental[All Fields] AND ("disease"[MeSH Terms] OR "disease"[All Fields] OR "disorder"[All Fields])))

PsychINFO:

((work or international or abroad or immigrant) and (culture or adjustment) and (stress or (mental and disorder))).mp. [mp=title, abstract, heading word, table of contents, key concepts, original title, tests & measures]

Embase:

((work or international or abroad or immigrant) and (culture or adjustment) and (stress or (mental and disorder))).mp. [mp=title, abstract, heading word, drug trade name, original title, device manufacturer, drug manufacturer, device trade name, keyword]

Cochrane Central Register of Controlled Trials (CENTRAL):

'(Work OR International OR Abroad OR Immigrant) AND (Culture OR Adjustment)  
AND (stress OR (mental AND disorder)) in Title, Abstract, Keywords, Publication  
Year from 2000 to 2015 in Trials'

## Supplementary B

### The quality assessment of qualitative studies

| Study                     | 1 | 2 | 3 | 4 | 5 | 6 | 7 | 8 | 9 | 10 |
|---------------------------|---|---|---|---|---|---|---|---|---|----|
| Connor et al., 2014       | Y | Y | Y | Y | Y | Y | Y | Y | Y | Y  |
| Espino et al., 2002*      | Y | N | - | - | - | - | - | - | - | -  |
| Gabel et al., 2005*       | Y | Y | Y | Y | N | N | Y | Y | Y | Y  |
| Jassawalla et al., 2004   | Y | Y | Y | Y | N | C | C | Y | Y | Y  |
| Luxon et al., 2009        | Y | Y | Y | Y | Y | Y | C | Y | Y | Y  |
| Negi, 2012*               | Y | Y | Y | Y | Y | Y | Y | Y | Y | Y  |
| Nilvarangkul et al., 2010 | Y | Y | Y | Y | Y | C | Y | Y | Y | Y  |
| Okamoto et al., 2011      | Y | Y | Y | Y | Y | C | C | Y | Y | Y  |
| Rosenbusch et al., 2015*  | Y | Y | Y | Y | Y | C | C | Y | Y | Y  |
| Snipes et al., 2007*      | Y | Y | Y | Y | Y | Y | C | Y | Y | Y  |
| Stahl et al., 2005*       | Y | Y | Y | Y | Y | C | C | Y | Y | Y  |
| Tsai et al., 2007         | Y | Y | Y | Y | Y | C | C | Y | Y | Y  |
| Weishaar, 2008            | Y | Y | Y | Y | Y | C | Y | Y | Y | Y  |
| Winkelman et al., 2013*   | Y | Y | Y | Y | Y | C | N | Y | Y | Y  |

1. Was there a clear statement of the aims of the research?

2. Is a qualitative methodology appropriate?

3. Was the research design appropriate to address the aims of the research?

4. Was the recruitment strategy appropriate to the aims of the research?

5. Was the data collected in a way that addressed the research issue?

6. Has the relationship between researcher and participants been adequately considered?

7. Have ethical issues been taken into consideration?

8. Was the data analysis sufficiently rigorous?

9. Is there a clear statement of findings?

10. How valuable is the research?

Y, Yes; C, Can't tell; N, No.

\*; mixed model study.

## Supplementary C

### The risk of bias assessment for non-randomised studies

| Study                        | Domain |      |      |      |         |         |
|------------------------------|--------|------|------|------|---------|---------|
|                              | 1      | 2    | 3    | 4    | 5       | 6       |
| Case-control study design    |        |      |      |      |         |         |
| Wang et al., 2007            | Low    | Low  | High | High | Low     | Unclear |
| Cohort study design          |        |      |      |      |         |         |
| Hoppe et al., 2009           | Low    | Low  | High | High | High    | Unclear |
| Pasca et al., 2012           | Low    | Low  | High | High | Low     | Unclear |
| Cross-sectional study design |        |      |      |      |         |         |
| Alderete et al., 2001        | Low    | Low  | Low  | High | Low     | Unclear |
| Alkhadher et al., 2007       | Low    | High | High | High | High    | Unclear |
| Al-Maskari et al., 2011      | Low    | Low  | High | High | High    | Unclear |
| Ayalon, 2010                 | High   | Low  | High | High | Unclear | Unclear |
| Bhanugopan et al., 2006      | Low    | Low  | High | High | High    | Unclear |
| Brown et al., 2000           | Low    | Low  | High | High | Low     | Unclear |
| Burkholder et al., 2010      | Low    | Low  | High | High | Low     | Unclear |
| Chen et al., 2010            | Low    | Low  | High | High | Low     | Unclear |
| de Castro et al., 2010       | Low    | High | High | High | Low     | Unclear |
| Deosthalee, 2002             | High   | High | High | High | Unclear | Unclear |
| Donlan et al., 2010          | Low    | High | High | High | High    | Unclear |
| Ea et al., 2008              | Low    | High | High | High | Low     | Unclear |
| Espino et al., 2002*         | Low    | High | High | High | High    | Unclear |
| Fujishiro et al., 2010       | Low    | Low  | High | High | High    | High    |
| Gabel et al., 2005*          | Low    | High | High | High | High    | Unclear |
| Griffin et al., 2003         | Low    | Low  | High | High | Low     | Unclear |
| Grzywacz et al., 2010        | Low    | Low  | High | High | Low     | Unclear |
| Hayne et al., 2009           | Low    | High | High | High | High    | Unclear |
| Hiott et al., 2008           | Low    | Low  | High | High | Low     | Unclear |
| Hovey et al., 2002           | Low    | Low  | High | High | Unclear | Unclear |
| Huang et al., 2011           | Low    | High | High | High | Low     | Unclear |
| Karkar et al., 2015          | Low    | High | High | High | Unclear | Unclear |
| Kawai et al., 2015           | Low    | Low  | High | High | High    | Unclear |
| Lee et al., 2012             | Low    | Low  | High | High | Low     | Unclear |

|                          |      |      |      |      |         |         |
|--------------------------|------|------|------|------|---------|---------|
| Negi, 2012*              | Low  | Low  | High | High | Unclear | Unclear |
| Rosenbusch et al., 2015* | Low  | Low  | High | High | Unclear | Unclear |
| Shaffer et al., 2013     | Low  | Low  | High | High | High    | Unclear |
| Silbiger et al., 2014    | Low  | Low  | High | High | High    | Unclear |
| Snipes et al., 2007*     | Low  | High | High | High | Unclear | Unclear |
| Stahl et al., 2005*      | Low  | Low  | High | High | Unclear | Unclear |
| Stroppa et al., 2011     | Low  | Low  | High | High | Low     | Unclear |
| Tsutsumi et al., 2005    | Low  | High | High | High | Low     | Unclear |
| Wadsworth et al., 2006   | Low  | Low  | High | High | Low     | Unclear |
| Wang et al., 2004        | Low  | Low  | High | High | Low     | Unclear |
| Winkelman et al., 2013*  | Low  | High | High | High | Unclear | Unclear |
| Zahid et al., 2003       | High | High | High | High | Unclear | Unclear |

1. The selection of participants
2. Confounding variables
3. Measurement of exposure
4. Blinding of outcome assessments
5. Incomplete outcome data
6. Selective outcome reporting

## Supplementary D

The risk of bias assessment for a randomised controlled trial

| Study               | Domain |         |         |     |     |         |      |
|---------------------|--------|---------|---------|-----|-----|---------|------|
|                     | 1      | 2       | 3       | 4   | 5   | 6       | 7    |
| Lee et al.,<br>2014 | High   | Unclear | Unclear | Low | Low | Unclear | High |

1. Random sequence generation
2. Allocation concealment
3. Blinding of participants and personnel
4. Blinding of outcome assessment
5. Incomplete outcome data
6. Selective reporting
7. Other bias
